# Supplementary material for: Assessment of Respiratory Health Symptoms and Asthma in Children near a Drying Saline Lake
Source: PubMed Central journal article supplement (PMC6843482; doi:10.3390/ijerph16203828), 2019-10-11
Supplement: ijerph-16-03828-s001.pdf [file ijerph-16-03828-s001.pdf]

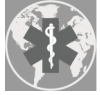

**Supplemental Material**

|                                                                                                                                                       | <b>Page</b> |
|-------------------------------------------------------------------------------------------------------------------------------------------------------|-------------|
| <b>Supplemental Table S1.</b> Prevalence of respiratory symptoms, health care utilization and medication use among school-age participants (N = 357). | 2-3         |
| <b>Supplemental Table S2.</b> Impact of wheezing among asthmatic and non-asthmatic participants reporting any lifetime wheeze (N = 126).              | 4           |
| <b>Supplemental Table S3.</b> Housing characteristics among study participants (N = 357).                                                             | 5           |

**Supplemental Table S1.** Prevalence of respiratory symptoms, health care utilization and medication use among school-age participants (n = 357).

| <b>Respiratory Symptoms</b>                | <b>N (%)</b> |
|--------------------------------------------|--------------|
| <b>Lifetime Wheezing</b>                   |              |
| Yes                                        | 126 (35.3)   |
| No                                         | 213 (59.7)   |
| Missing                                    | 18 (5.0)     |
| <b>Allergies</b>                           |              |
| Yes                                        | 129 (36.1)   |
| No                                         | 203 (56.9)   |
| Missing                                    | 25 (7.0)     |
| <b>Dry Cough</b>                           |              |
| Yes                                        | 119 (33.3)   |
| No                                         | 220 (61.6)   |
| Missing                                    | 18 (5.0)     |
| <b>Dry Cough for More than 3 Weeks</b>     |              |
| Yes                                        | 46 (12.9)    |
| No                                         | 73 (20.5)    |
| Missing                                    | 238 (66.7)   |
| <b>Dry Cough in the Morning</b>            |              |
| Yes                                        | 31 (8.7)     |
| No                                         | 313 (87.7)   |
| Missing                                    | 13 (3.7)     |
| <b>Dry Cough at Other Times of the Day</b> |              |
| Yes                                        | 27 (7.6)     |
| No                                         | 318 (89.1)   |
| Missing                                    | 12 (3.4)     |
| <b>Congestion</b>                          |              |
| Yes                                        | 61 (17.1)    |
| No                                         | 279 (78.2)   |
| Missing                                    | 17 (4.8)     |
| <b>Bronchitic Symptoms<sup>a</sup></b>     |              |
| Yes                                        | 102 (28.6)   |
| No                                         | 255 (71.4)   |
| <b>Doctor Visit Due to Wheezing</b>        |              |
| Yes                                        | 103 (28.9)   |
| No                                         | 254 (71.2)   |
| <b>ER Visit Due to Wheezing</b>            |              |
| Yes                                        | 57 (16.0)    |
| No                                         | 300 (84.0)   |
| <b>Medication Use</b>                      |              |
| Yes                                        | 83 (23.3)    |
| No                                         | 267 (74.8)   |
| Missing                                    | 7 (2.0)      |
| <b>Rescue Medication Use</b>               |              |
| Yes                                        | 90 (25.2)    |
| No                                         | 267 (74.8)   |
| <b>Control Medication Use</b>              |              |
| Yes                                        | 35 (9.2)     |
| No                                         | 322 (9.8)    |
| <b>Nebulizer Use</b>                       |              |
| Yes                                        | 73 (20.5)    |
| No                                         | 284 (79.6)   |

<sup>a</sup> Bronchitic Symptoms defined as having at least one of the following symptoms 1) daily cough for 3 months in a row, 2) congestion or phlegm for at least 3 months in a row, and 3) bronchitis in the past 12 months.

**Supplemental Table S2.** Impact of wheezing among asthmatic and non-asthmatic participants reporting any lifetime wheeze (N = 126).

|                                                               | <b>Total<br/>N = 126<br/>(%)</b> | <b>Asthmatics<br/>reporting any<br/>lifetime wheeze<br/>N = 71 (%)</b> | <b>Non-asthmatics<br/>reporting any lifetime<br/>wheeze<br/>N = 55 (%)</b> | <b>p-value</b> |
|---------------------------------------------------------------|----------------------------------|------------------------------------------------------------------------|----------------------------------------------------------------------------|----------------|
| <b>Wheeze in the Past 12 Months</b>                           |                                  |                                                                        |                                                                            |                |
| Yes                                                           | 78 (61.9)                        | 53 (74.7)                                                              | 25 (45.5)                                                                  | <b>0.002</b>   |
| No                                                            | 44 (34.9)                        | 17 (23.9)                                                              | 27 (49.1)                                                                  |                |
| Missing                                                       | 4 (3.2)                          | 1 (1.4)                                                                | 3 (5.5)                                                                    |                |
| <b>Sleep Disturbance Due to Wheeze in the Past 12 Months</b>  |                                  |                                                                        |                                                                            |                |
| Never awakened with wheezing                                  | 20 (15.9)                        | 10 (14.1)                                                              | 10 (18.2)                                                                  | 0.09           |
| Less than one night per week                                  | 32 (25.4)                        | 22 (31.0)                                                              | 10 (18.2)                                                                  |                |
| One or more nights per week                                   | 22 (17.5)                        | 18 (25.4)                                                              | 4 (7.3)                                                                    |                |
| Missing                                                       | 52 (41.3)                        | 21 (29.6)                                                              | 31 (56.4)                                                                  |                |
| <b>Speech Disturbance Due to Wheeze in the Past 12 Months</b> |                                  |                                                                        |                                                                            |                |
| Yes                                                           | 10 (7.9)                         | 9 (12.7)                                                               | 1 (1.8)                                                                    | 0.13           |
| No                                                            | 66 (52.4)                        | 44 (62.0)                                                              | 22 (40.0)                                                                  |                |
| Missing                                                       | 50 (39.7)                        | 18 (25.4)                                                              | 32 (58.2)                                                                  |                |
| <b>Wheeze After Exercise in the Past 12 Months</b>            |                                  |                                                                        |                                                                            |                |
| Yes                                                           | 47 (37.3)                        | 32 (45.1)                                                              | 15 (27.3)                                                                  | 0.98           |
| No                                                            | 31 (24.6)                        | 21 (29.6)                                                              | 10 (18.2)                                                                  |                |
| Missing                                                       | 48 (38.1)                        | 18 (25.4)                                                              | 30 (54.6)                                                                  |                |

**Supplemental Table S3.** Housing characteristics among study participants (N = 357).

|                                               | <b>Total</b><br>N= 357(%) | <b>Asthmatics</b><br>N = 80 (%) | <b>Non-Asthmatics</b><br>N = 277 (%) | <b>p-value<sup>a</sup></b> |
|-----------------------------------------------|---------------------------|---------------------------------|--------------------------------------|----------------------------|
| <b>Housing type</b>                           |                           |                                 |                                      | 0.91                       |
| House                                         | 198 (55.5)                | 46 (57.5)                       | 152 (54.9)                           |                            |
| Apartment                                     | 113 (31.7)                | 25 (31.3)                       | 88 (31.8)                            |                            |
| Mobile home or trailer                        | 35 (9.8)                  | 7 (8.8)                         | 28 (10.1)                            |                            |
| Missing                                       | 11 (3.1)                  | 2 (2.5)                         | 9 (3.3)                              |                            |
| <b>Lived in the same house for whole life</b> |                           |                                 |                                      | 0.30                       |
| Yes                                           | 93 (26.1)                 | 25 (31.3)                       | 68 (24.6)                            |                            |
| No                                            | 255 (71.4)                | 55 (68.8)                       | 200 (72.2)                           |                            |
| Missing                                       | 9 (2.5)                   | 0 (0.0)                         | 9 (3.3)                              |                            |
| <b>Gas cooking stove in home</b>              |                           |                                 |                                      | 0.09                       |
| Yes                                           | 296 (82.9)                | 62 (77.5)                       | 234 (84.5)                           |                            |
| No                                            | 54 (15.1)                 | 17 (21.3)                       | 37 (13.4)                            |                            |
| Missing                                       | 7 (2.0)                   | 1 (1.3)                         | 6 (2.2)                              |                            |
| <b>Length of gas use (N = 296)</b>            |                           |                                 |                                      | 0.03                       |
| Less than 30 minutes                          | 138 (46.6)                | 24 (38.7)                       | 114 (48.7)                           |                            |
| Less than 1 hour                              | 111 (37.5)                | 26 (41.9)                       | 85 (36.3)                            |                            |
| More than 1 hour                              | 28 (9.5)                  | 11 (17.7)                       | 17 (7.3)                             |                            |
| Missing                                       | 19 (6.4)                  | 1 (1.6)                         | 18 (7.7)                             |                            |
| <b>Air conditioner in home</b>                |                           |                                 |                                      | 0.91                       |
| Yes                                           | 344 (96.4)                | 78 (97.5)                       | 266 (96.0)                           |                            |
| No                                            | 4 (1.1)                   | 1 (1.3)                         | 3 (1.1)                              |                            |
| Missing                                       | 9 (2.5)                   | 1 (1.3)                         | 8 (2.9)                              |                            |
| <b>Water damage in home</b>                   |                           |                                 |                                      | 0.04                       |
| Yes                                           | 29 (8.1)                  | 11 (13.8)                       | 18 (6.5)                             |                            |
| No                                            | 296 (82.9)                | 62 (77.5)                       | 234 (84.5)                           |                            |
| Missing                                       | 32 (9.0)                  | 7 (8.8)                         | 25 (9.0)                             |                            |
| <b>Mold</b>                                   |                           |                                 |                                      | 0.31                       |
| Yes                                           | 50 (14.0)                 | 14 (17.5)                       | 36 (13.0)                            |                            |
| No                                            | 265 (74.2)                | 57 (71.2)                       | 208 (75.1)                           |                            |
| Missing                                       | 42 (11.8)                 | 9 (11.3)                        | 33 (11.9)                            |                            |
| <b>Musty odor in home</b>                     |                           |                                 |                                      | 0.05                       |
| Yes                                           | 14 (3.9)                  | 6 (7.5)                         | 8 (2.9)                              |                            |
| No                                            | 314 (88.0)                | 66 (82.5)                       | 248 (89.5)                           |                            |
| Missing                                       | 29 (8.1)                  | 8 (10.0)                        | 21 (7.6)                             |                            |
| <b>Carpet in home</b>                         |                           |                                 |                                      | 0.27                       |
| Yes                                           | 213 (59.6)                | 53 (66.3)                       | 160 (57.8)                           |                            |
| No                                            | 132 (37.0)                | 26 (32.5)                       | 106 (38.3)                           |                            |
| Missing                                       | 12 (3.4)                  | 1 (1.3)                         | 11 (4.0)                             |                            |
| <b>Pet at home</b>                            |                           |                                 |                                      | 0.05                       |
| Furry pet                                     | 105 (29.4)                | 15 (18.8)                       | 90 (32.5)                            |                            |
| Another pet                                   | 27 (7.6)                  | 8 (10.0)                        | 19 (6.9)                             |                            |
| None                                          | 214 (59.9)                | 55 (68.8)                       | 159 (57.4)                           |                            |
| Missing                                       | 11 (3.1)                  | 2 (2.5)                         | 9 (3.3)                              |                            |
| <b>Regular contact with farm animal</b>       |                           |                                 |                                      | 0.72                       |
| Yes                                           | 44 (12.3)                 | 11 (13.8)                       | 33 (11.9)                            |                            |
| No                                            | 244 (68.4)                | 55 (68.8)                       | 189 (68.2)                           |                            |
| Missing                                       | 69 (19.3)                 | 14 (17.5)                       | 55 (19.9)                            |                            |
| <b>Problem with pests at home</b>             |                           |                                 |                                      | 0.70                       |
| Insects                                       | 83 (23.3)                 | 22 (27.5)                       | 61 (22.0)                            |                            |
| Rats and cockroaches                          | 35 (9.8)                  | 7 (8.8)                         | 28 (10.1)                            |                            |
| None                                          | 198 (55.5)                | 45 (56.3)                       | 153 (55.2)                           |                            |
| Missing                                       | 41 (11.5)                 | 6 (7.5)                         | 35 (12.6)                            |                            |
| <b>Cigarette smoker at home</b>               |                           |                                 |                                      | 0.01                       |
| Yes                                           | 13 (3.6)                  | 7 (8.8)                         | 6 (2.2)                              |                            |
| No                                            | 332 (93.0)                | 72 (90.0)                       | 260 (93.9)                           |                            |
| Missing                                       | 12 (3.4)                  | 1 (1.3)                         | 11 (4.0)                             |                            |

<sup>a</sup> As determined by chi-squared or Fisher's exact test.
